# Supplementary material
Source: publisher site journal article supplement (https://www.dovepress.com/article/485512)
Supplement: Supplementary file 1 [file get_supplementary_file.php]

**Table S1**. Collinearity diagnostics in the final adjusted model

| **No.** | **Condition**  **index** | **Proportion of Variation** | | | | | | | |
| --- | --- | --- | --- | --- | --- | --- | --- | --- | --- |
| **Intercept** | **Gender** | **Age**  **45-54** | **Age**  **55-79** | **BSA ≥10%** | **Use of biologics** | **DLQI score** 11–30 | **Anxiety** |
| 1 | 1.000 | 0.016 | 0.022 | 0.017 | 0.010 | 0.027 | 0.016 | 0.023 | 0.019 |
| 2 | 1.830 | 0.001 | 0.004 | 0.164 | 0.450 | 0.000 | 0.015 | 0.001 | 0.029 |
| 3 | 1.932 | 0.001 | 0.023 | 0.003 | 0.003 | 0.011 | 0.547 | 0.013 | 0.275 |
| 4 | 2.082 | 0.000 | 0.531 | 0.055 | 0.094 | 0.063 | 0.008 | 0.008 | 0.092 |
| 5 | 2.203 | 0.020 | 0.000 | 0.244 | 0.014 | 0.009 | 0.292 | 0.000 | 0.418 |
| 6 | 2.394 | 0.002 | 0.003 | 0.084 | 0.123 | 0.690 | 0.091 | 0.013 | 0.106 |
| 7 | 2.934 | 0.013 | 0.336 | 0.066 | 0.057 | 0.182 | 0.004 | 0.540 | 0.041 |
| 8 | 4.736 | 0.948 | 0.080 | 0.368 | 0.248 | 0.019 | 0.026 | 0.402 | 0.020 |

Abbreviations: BSA, body surface area; DLQI, Dermatology Life Quality Index

**Table S2**. Factors associated with treatment satisfaction in patients with psoriasis in 2015 (n=273)

| **Variables** | **No. of patients** | **Unadjusted model** | | **Adjusted model*** | | |
| --- | --- | --- | --- | --- | --- | --- |
| **Coefficient** | ***p*** | **Coefficient** | ***p*** | **Variance inflation** |
| Gender |  |  |  |  |  |  |
| Male | 190 | Ref. |  | Ref. |  |  |
| Female | 83 | -0.60 | 0.284 | 0.60 | 0.905 | 1.094 |
| Age (years) |  |  |  |  |  |  |
| 20–44 | 152 | Ref. |  | Ref. |  |  |
| 45–54 | 83 | -0.21 | 0.708 | -0.59 | 0.230 | 1.130 |
| 55–79 | 38 | 0.18 | 0.811 | -0.15 | 0.822 | 1.151 |
| Severity of psoriasis (BSA involvement) |  |  |  |  |  |  |
| Mild to moderate (<10%) | 190 | Ref. |  | Ref. |  |  |
| Severe (≥10%) | 83 | -0.83 | 0.120 | -0.44 | 0.382 | 1.187 |
| Use of biologics |  |  |  |  |  |  |
| No | 246 | Ref. |  | Ref. |  |  |
| Yes | 27 | 3.64 | <0.001 | 3.76 | <0.001 | 1.091 |
| DLQI total score |  |  |  |  |  |  |
| 0–10 (better QoL) | 121 | Ref. |  | Ref. |  |  |
| 11–30 (worse QoL) | 152 | -3.46 | <0.001 | -3.16 | <0.001 | 1.120 |
| Comorbidity |  |  |  |  |  |  |
| Diabetes | 17 | -1.32 | 0.197 | - | - |  |
| Depression | 47 | -2.19 | <0.001 | - | - |  |
| Anxiety | 31 | -2.92 | <0.001 | - | - |  |
| Insomnia | 44 | -1.99 | 0.003 | - | - |  |
| Site of psoriasis |  |  |  |  |  |  |
| Head | 213 | -1.27 | 0.032 | - | - |  |
| Face | 127 | -1.41 | 0.004 | -1.10 | 0.016 | 1.133 |
| Arm | 210 | -1.46 | 0.012 | - | - |  |
| Foot | 118 | -1.36 | 0.006 | - | - |  |
| Marital status |  |  |  |  |  |  |
| Single/Divorced/widowed | 95 | Ref. |  |  |  |  |
| Married | 178 | 0.94 | 0.068 | - | - |  |
| Annual income (USD) |  |  |  |  |  |  |
| <48,000 | 128 |  |  |  |  |  |
| ≥48,000 | 145 | 0.99 | 0.044 | - | - |  |

Abbreviations: BSA, body surface area; DLQI, Dermatology Life Quality Index; QoL, quality of life; Ref., reference.

* Through backward elimination, variables without significant adjusted p-values were removed from the multivariable model.
